# Supplementary material
Source: PubMed Central journal article supplement (PMC6923580)
Supplement: NIHMS1055501-supplement-Supp_info.pdf [file NIHMS1055501-supplement-Supp_info.pdf]

# Electrostatic Complementarity Drives Amyloid/Nucleic Acid Co-assembly

Allisandra K. Rha, Dibyendu Das, Anil K. Mehta, Olga Taran, Yonggang Ke, and David G. Lynn\*

\*To whom correspondence should be addressed: [dlynn2@emory.edu](mailto:dlynn2@emory.edu)

This file includes:  
Supplementary Figures 1-9  
Corresponding materials and methods

## Table of Contents

|                                                                                                                                                  |               |
|--------------------------------------------------------------------------------------------------------------------------------------------------|---------------|
| <b>Peptide Assembly</b>                                                                                                                          |               |
| <a href="#">Peptide Synthesis</a> .....                                                                                                          | 1             |
| <a href="#">Peptide Assembly</a> .....                                                                                                           | 1             |
| <a href="#">Supplementary Figure 1: Characterization of multi-lamellar peptide/RNA nanotubes</a> .....                                           | 2             |
| <a href="#">Supplementary Figure 2: <i>pep-KG</i> and <i>pep-RG</i> co-assembled with various DNA lengths</a> .....                              | 3             |
| <b>Peptide/RNA Co-assembly</b>                                                                                                                   |               |
| <a href="#">Laser Scanning Confocal Microscopy</a> .....                                                                                         | 4             |
| <a href="#">Supplementary Figure 3: Co-localization of amyloid and nucleic acid domains</a> .....                                                | 5             |
| <a href="#">Electrostatic Force Microscopy</a> .....                                                                                             | 6             |
| <a href="#">Supplementary Figure 4: Electrostatic Force Microscopy of the <i>Pep-KG</i>/RNA nanostructure surface</a> .....                      | 6             |
| <a href="#">Supplementary Figure 5: Magnesium ion influence on peptide/RNA co-assembly</a> .....                                                 | 7             |
| <a href="#">Supplementary Figure 6: Magnesium ion influence on peptide assembly</a> .....                                                        | 8             |
| <b>Solid State NMR</b>                                                                                                                           |               |
| <a href="#">Synthesis of <math>Zr[(O_3PCH_2)(HO_3PCH_2)NHCH_2COOH]_2 \cdot 2H_2O</math></a> .....                                                | 9             |
| <a href="#">Supplementary Figure 7: Structure rendered from CSD RISJEK</a> .....                                                                 | 9             |
| <a href="#">Supplementary Figure 8: <math>^{13}C</math> NMR spectrum of <math>Zr[(O_3PCH_2)(HO_3PCH_2)NHCH_2COOH]_2 \cdot 2H_2O</math></a> ..... | 10            |
| <a href="#">Supplementary Figure 9: <math>^{31}P</math> NMR spectrum of <math>Zr[(O_3PCH_2)(HO_3PCH_2)NHCH_2COOH]_2 \cdot 2H_2O</math></a> ..... | 111           |
| <a href="#">Solid-State NMR</a> .....                                                                                                            | 111           |
| <a href="#">References</a> .....                                                                                                                 | <b>Error!</b> |

**Bookmark not defined.**

## Supplementary Experimental Details

### Peptide Assembly

#### Methods

#### Peptide Synthesis

Peptides were synthesized using Solid Phase Peptide Synthesis with microwave synthesis (CEM, Matthews, NC, USA) with Fmoc-protected natural abundance (Anaspec, Fremont, CA) amino acids on a Rink-Amide MBHA resin, 0.4mmol/g substitution, and capped at the N-terminus with an acetyl group. Peptides were cleaved and deprotected using a cocktail of 90% TFA, 2% anisole, 3% 1,2-ethanedithiol, and 5% thioanisole. All chemicals were purchased from Sigma-Aldrich. Following cleavage and deprotection, peptides were purified by reverse-phase HPLC using acetonitrile and water with 0.1%TFA and a Waters Atlantis C18 column to >98% purity. After purification, acetonitrile was removed *in vacuo*. The remaining aqueous solution was frozen at -80°C or flash frozen using liquid nitrogen and lyophilized to yield a white powder.

#### Peptide Assembly

Due to the salt sensitivity of peptides and nucleic acids during assembly in this study, following purification and lyophilization, peptides were desalted using Sep-Pak® C18 cartridges (Waters). The resulting solutions were flash frozen using liquid nitrogen or overnight at -80C, lyophilized to yield a white powder, and concentrations determined from the dry weight of these lyophilized powders. Peptides were dissolved in 40% Acetonitrile with brief vortexing and then sonicated for 5 minutes. The pH was not adjusted and the pH each sample was measured to be pH5. A stock solution of 2mM peptide was used for all peptide assemblies. Samples were set up within five minutes of dissolution. For Nucleic acid/Peptide co-assemblies, a stock solution of 1mM nucleic acids (Integrated DNA Technologies) was used. Order of addition was as follows: Peptide, solvent, nucleic acid. Assemblies were kept at 4°C unless otherwise noted. Final peptide concentration in all experimental setups was 1mM. Final nucleic acid concentration depended on length. All co-assemblies were established with a 1:1 (peptide:nucleic acid) charge ratio.

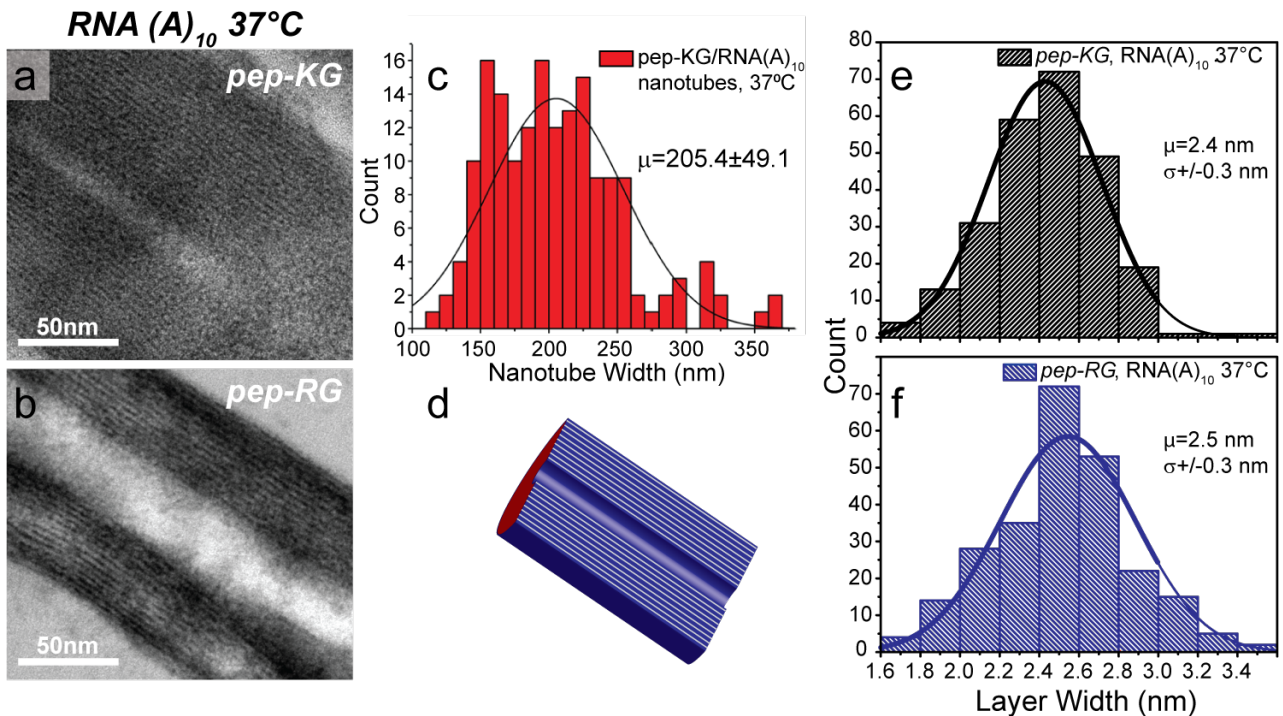

**Supplementary Figure 1. Characterization of multi-lamellar peptide/RNA nanotubes.** Transmission electron micrographs of nanotube longitudinal cross-sections show multi-lamellar tube walls (a, b). Cross-sections of thick-walled multi-lamellar pep-KG/RNA nanotubes (a, inset). Measurements of nanotube diameter from cross-sections of pep-KG/RNA(A)<sub>10</sub> co-assemblies at 37°C is  $205.4 \pm 49.1 \text{ nm}$ ,  $n=150$  (c). Simplified model of multi-lamellar nanotube longitudinal cross-section (d). Measurements of individual lamella within the tube walls define each lamella as  $2.4 \pm 0.3 \text{ nm}$  and  $2.5 \pm 0.3 \text{ nm}$  for pep-KG/RNA and pep-RG/RNA co-assemblies, respectively (e, f).

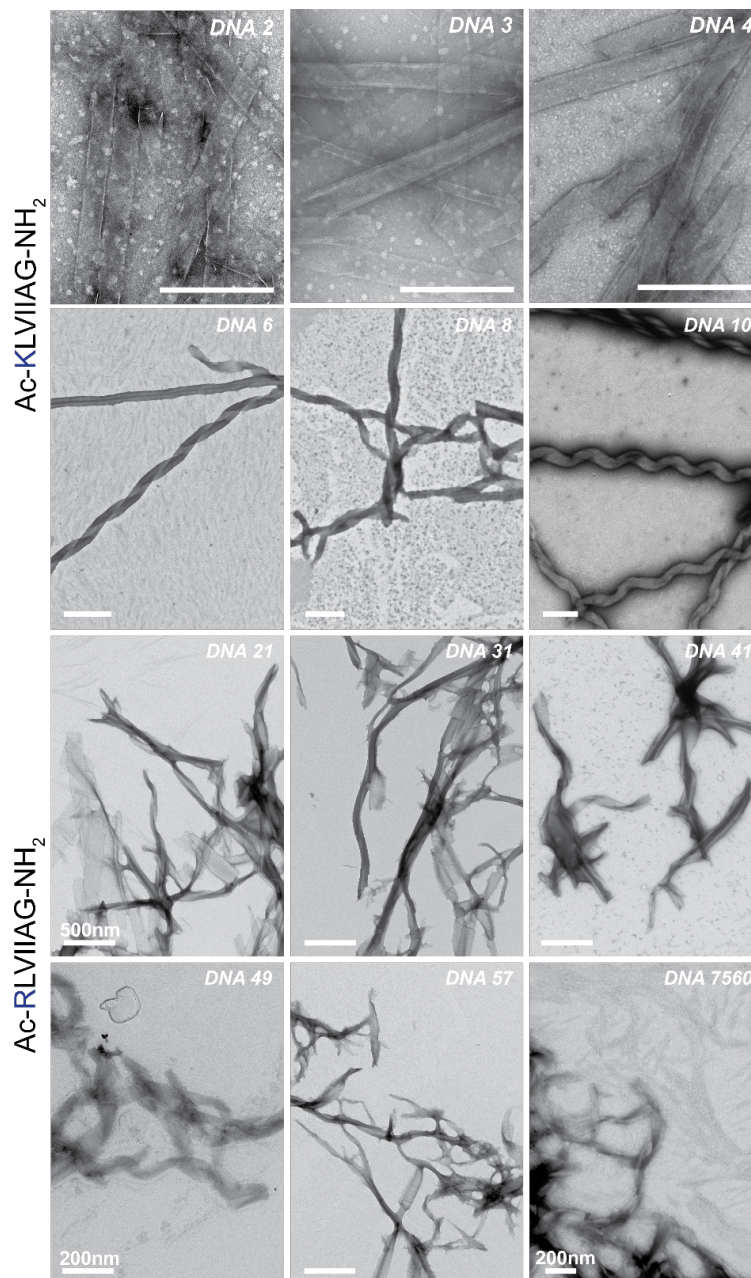

**Supplementary Figure 2. Assessment of varying DNA strand length on overall co-assembly morphology and homogeneity.** Transmission electron micrographs of *pep-KG* (Ac-KLVIIAG-NH<sub>2</sub>) and *pep-RG* (Ac-RLVIIAG-NH<sub>2</sub>) co-assembled with DNA(A) from 2 nucleotides to 7560 nucleotides. A minimum strand length of six nucleotides was necessary to achieve ribbonous assemblies. DNA with a strand length of 10 nucleotides gave the most homogeneous assemblies. DNA strand lengths of at least 7560 nucleotides yielded ribbon co-assemblies. Heterogeneity in co-assemblies is attributed to DNA prep when sheets are observed (d(A)<sub>21</sub>), and to an unmatched charge distribution in all other cases. Thinner ribbons are observed in several cases, but the overall morphology appears similar. **Scale bars are 500nm unless otherwise noted.**



## **Laser Scanning Confocal Microscopy**

Fluorescence micrographs were obtained using an Olympus FluoView 1000 (FV1000) laser-scanning confocal microscope. Thioflavin T was added to samples at a final concentration of 2mM prior to placement on microscope slides, with coverslips sealed using clear nail polish and examined using a 60X 1.42NA oil immersion objective using 405nm laser line. RNA(A)<sub>10</sub> with Cy3 covalently attached at the 3'-end was purchased from Integrated DNA Technologies and visualized using a 559nm laser line. Images for Thioflavin T and Cy3 fields were obtained concurrently and processed using Fiji image analysis software<sup>[1]</sup>.

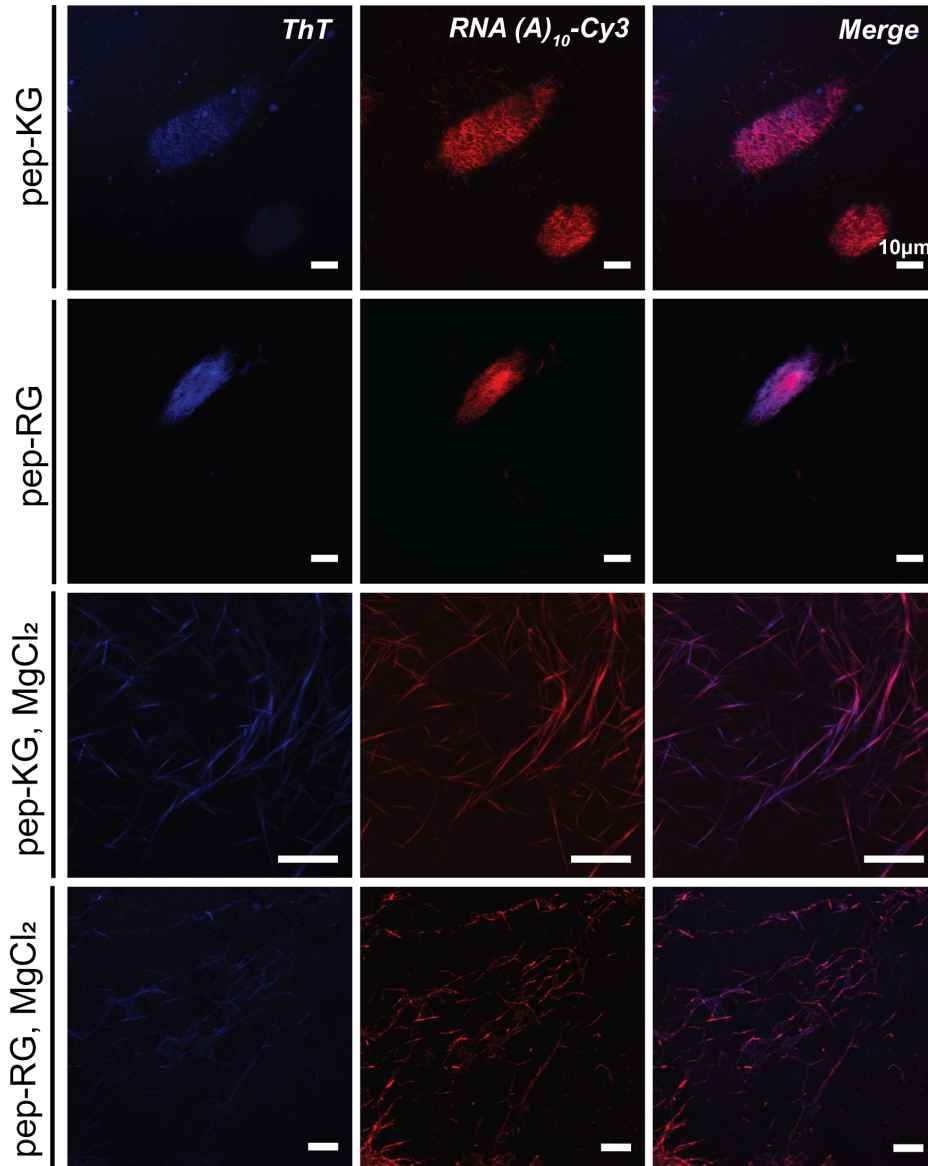

**Supplementary Figure 3. RNA/Peptide co-assembly visualized by laser scanning confocal microscopy.** *Pep-KG* and *pep-RG* co-assembled with RNA(A)<sub>10</sub>-Cy3 at 4°C, rows one and two, respectively. *Pep-KG* and *pep-RG* co-assembled with RNA(A)<sub>10</sub>-Cy3 in the presence of 300mM MgCl<sub>2</sub>, rows three and four, respectively. For all assemblies, fluorescence of ThioflavinT (ThT), an amyloid specific dye, is shown in the left panel, Cy3 covalently attached to RNA at the 3'-end in the middle panel, and the merge of the fluorescence for the two fluorophores in the right panel. Scale bars are 10µm.

### Electrostatic Force Microscopy (EFM)

A Park System XE-100 AFM (Suwon 16229, Korea) with a charge bias of +1V applied between the cantilever and the sample created an electrostatic field allowing for the surveying of charge on the assembly surface. Pt-Ir coated cantilevers that are electrically conductive were used in non-contact mode to map electrical properties on the sample surface. The cantilever tip radius was <20nm and had a force constant of 2.8 N/m. Prior to EFM imaging, the NA/Peptide samples were deposited on gold film, Si/SiO<sub>2</sub> substrates. The thickness of the oxide layer was 300nm. The co-assemblies were deposited as 1  $\mu$ L droplets and dried over 12 hours before examination.

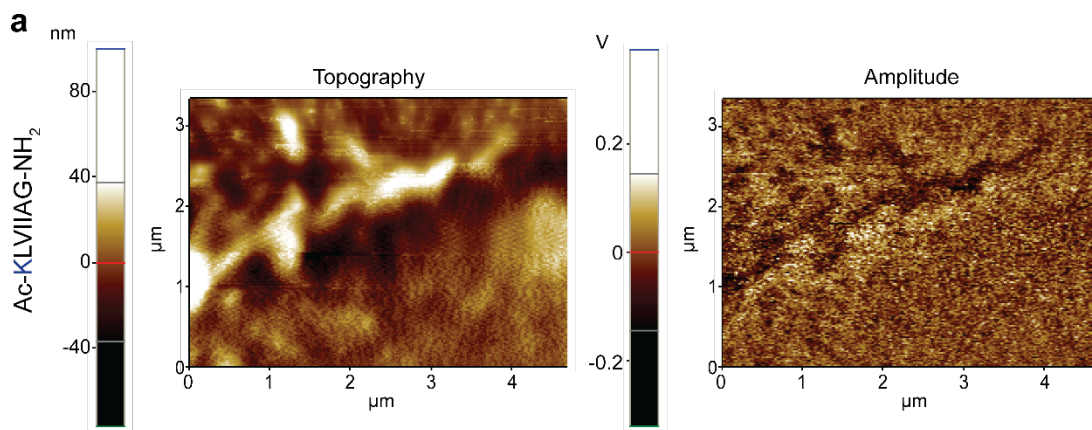

**Supplementary Figure 4.** Electrostatic Force Micrographs of a *pep-KG/RNA* ribbon. Topography is shown in the left panel with height in nm. Measure of charge distribution is shown in the right panel with dark areas indicating negative surface charge.

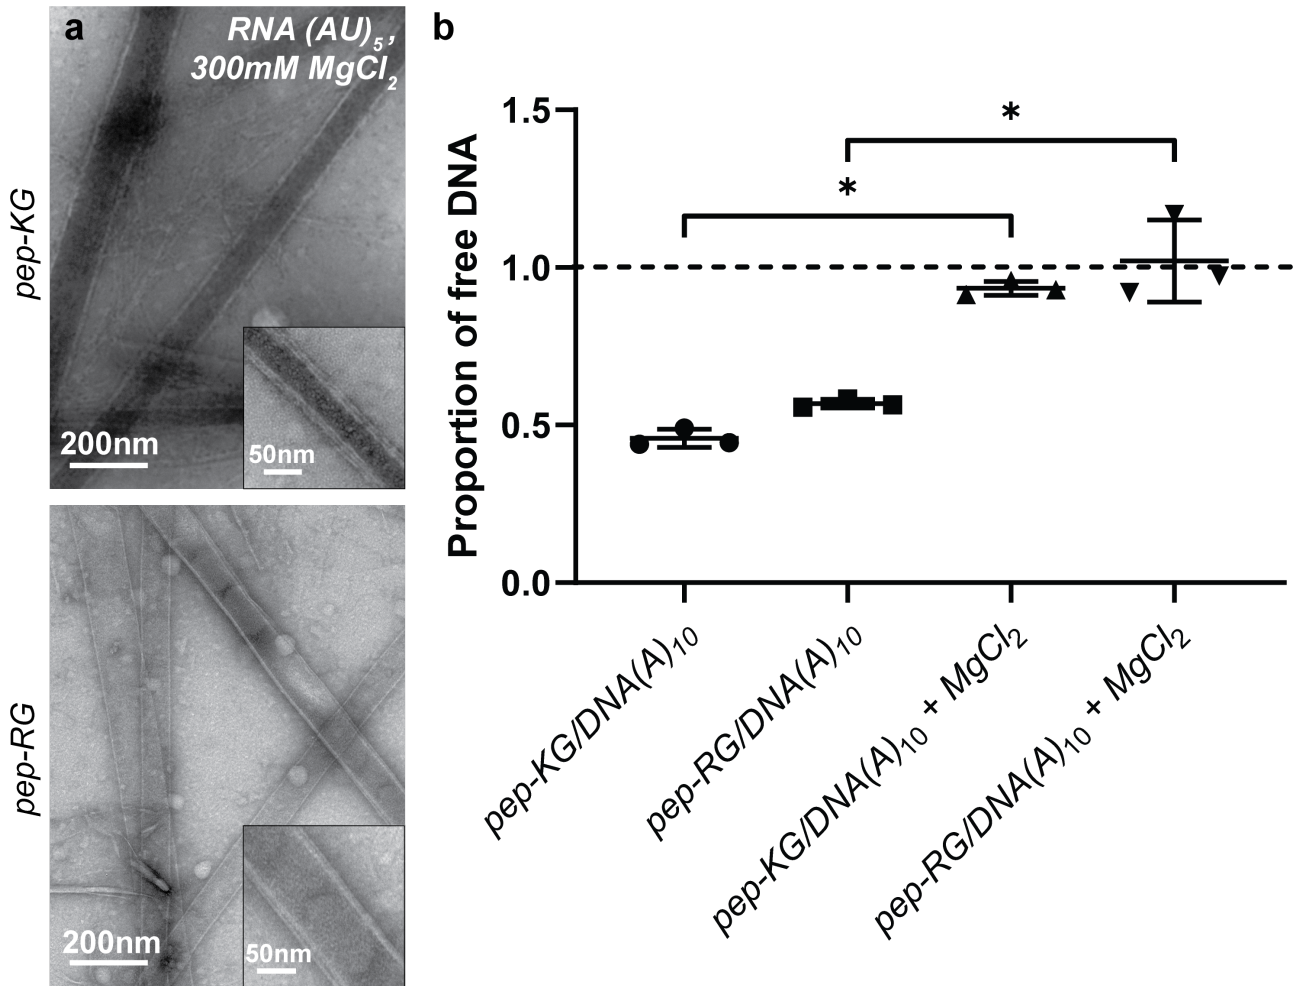

**Supplementary Figure 5. Magnesium ion influence on nucleic acid/peptide co-assembly.** Transmission electron micrographs of pep-KG/RNA and pep-RG/RNA co-assemblies in the presence of 300mM MgCl<sub>2</sub> (a). Nanotube walls have multiple lamellae (insets, a). Measurement of free DNA in supernatant of spun down co-assemblies with and without 300mM MgCl<sub>2</sub> (b). \*p<0.05 Welch's t-test. Dotted line represents total starting DNA. Sample values were measured as absorbance and normalized to starting DNA concentration.



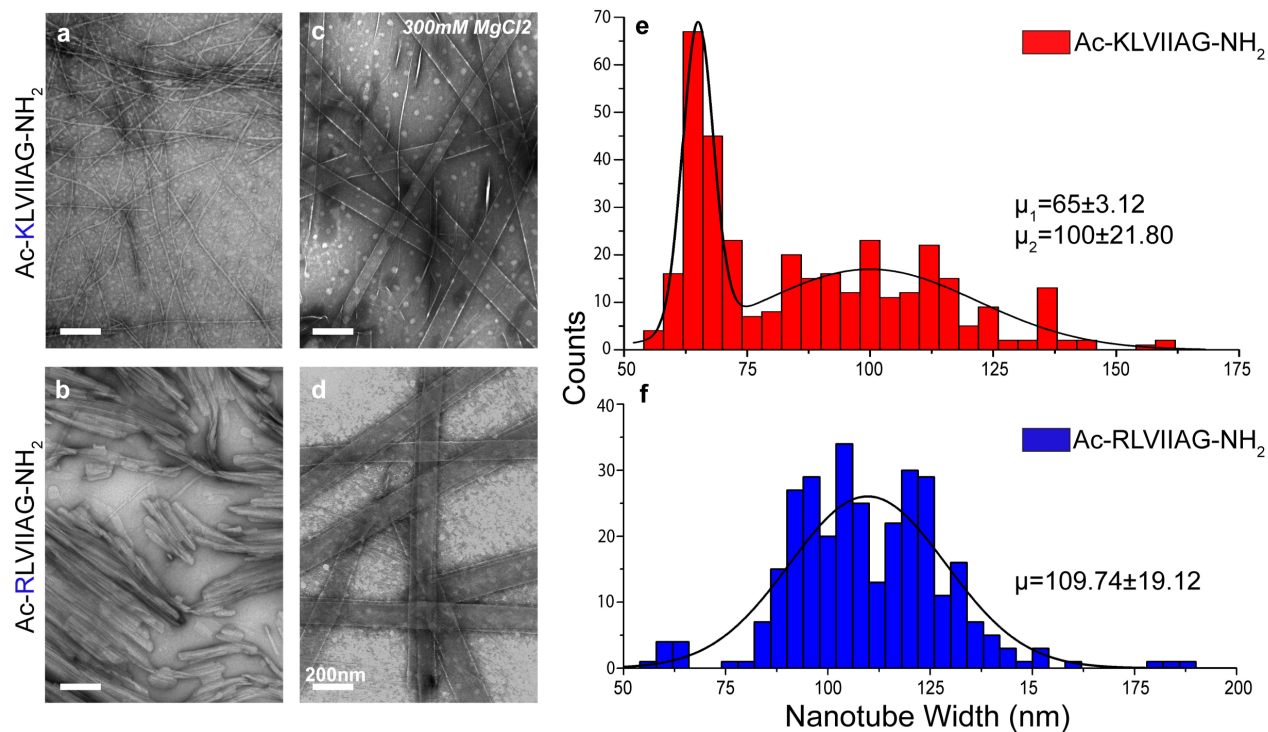

**Supplementary Figure 6. Magnesium ion influence on peptide assembly.** Transmission electron micrographs of pep-KG and pep-RG assemblies in the absence of MgCl<sub>2</sub> (a, b). Pep-KG and pep-RG assemblies in the presence of 300mM MgCl<sub>2</sub> (c, d). Measurement of nanotube width for pep-KG and pep-RG assemblies in the presence of 300mM MgCl<sub>2</sub> (e, f). For pep-KG assemblies, two nanotube populations were measured with mean widths of  $65 \pm 3.12$  and  $100 \pm 21.80$ nm. Pep-RG nanotubes had a mean width of  $109.74 \pm 19.12$ nm. **All scale** bars are 200nm.

## Synthesis of $\text{Zr}[(\text{O}_3\text{PCH}_2)(\text{HO}_3\text{PCH}_2)\text{NHCH}_2\text{COOH}]_2 \cdot 2\text{H}_2\text{O}$ as a $^{13}\text{C}\{^{31}\text{P}\}$ REDOR Calibration Standard

$\text{Zr}[(\text{O}_3\text{PCH}_2)(\text{HO}_3\text{PCH}_2)\text{NHCH}_2\text{COOH}]_2 \cdot 2\text{H}_2\text{O}$  (**Supplementary Fig. 7**) was synthesized following literature protocol<sup>[2]</sup>. A clear solution of (2- $^{13}\text{C}$ ) Glyphosine (300mg, 1.2mmol, Cambridge Isotopes, Tewksbury, MA) in 9mL of water was added to a solution of  $\text{ZrOCl}_2 \cdot 8\text{H}_2\text{O}$  (192mg, 0.6mmol) in 2.9M HF (2.46mL, 7.2mmol) in a closed HDPE vessel. The mixture was maintained at 80°C for 7 days in a mineral oil bath. White crystals were obtained and isolated using vacuum filtration. After washing with water, crystals were placed in a vacuum desiccator where they were dried for 48 hours. A 97mg quantity of product was recovered. The product was confirmed to be the correct structure by XRD with unit cell dimensions as follows:  $a = 5.44\text{\AA}$ ,  $b = 14.95\text{\AA}$ ,  $c = 13.31\text{\AA}$ ,  $\alpha = 90^\circ$ ,  $\beta = 95.26^\circ$ ,  $\gamma = 90^\circ$ .

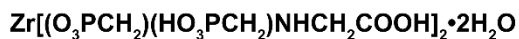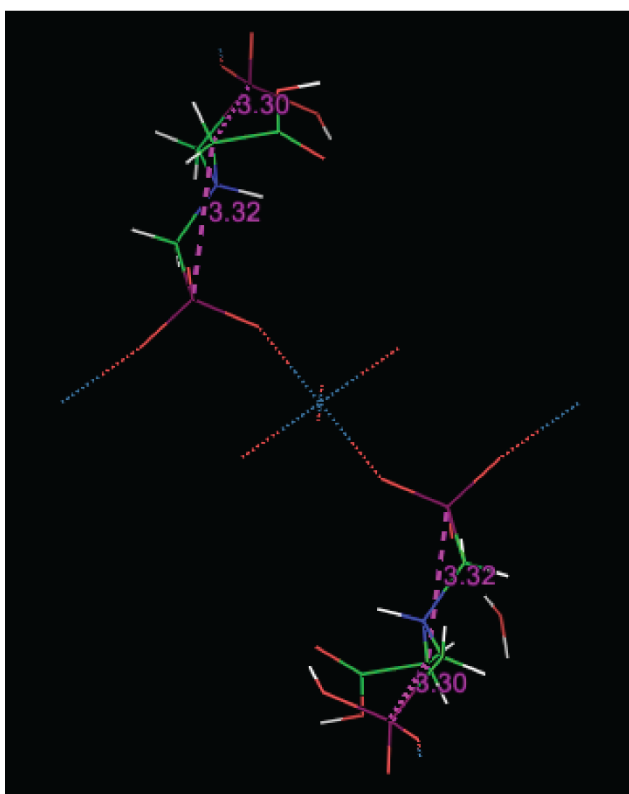

**Supplementary Figure 7.** Structure rendered from CSD RISJEK<sup>1</sup>. Measurements indicate distances between phosphorus nuclei and  $^{13}\text{C}$ -enriched carbon. Only distances within 5Å are shown.

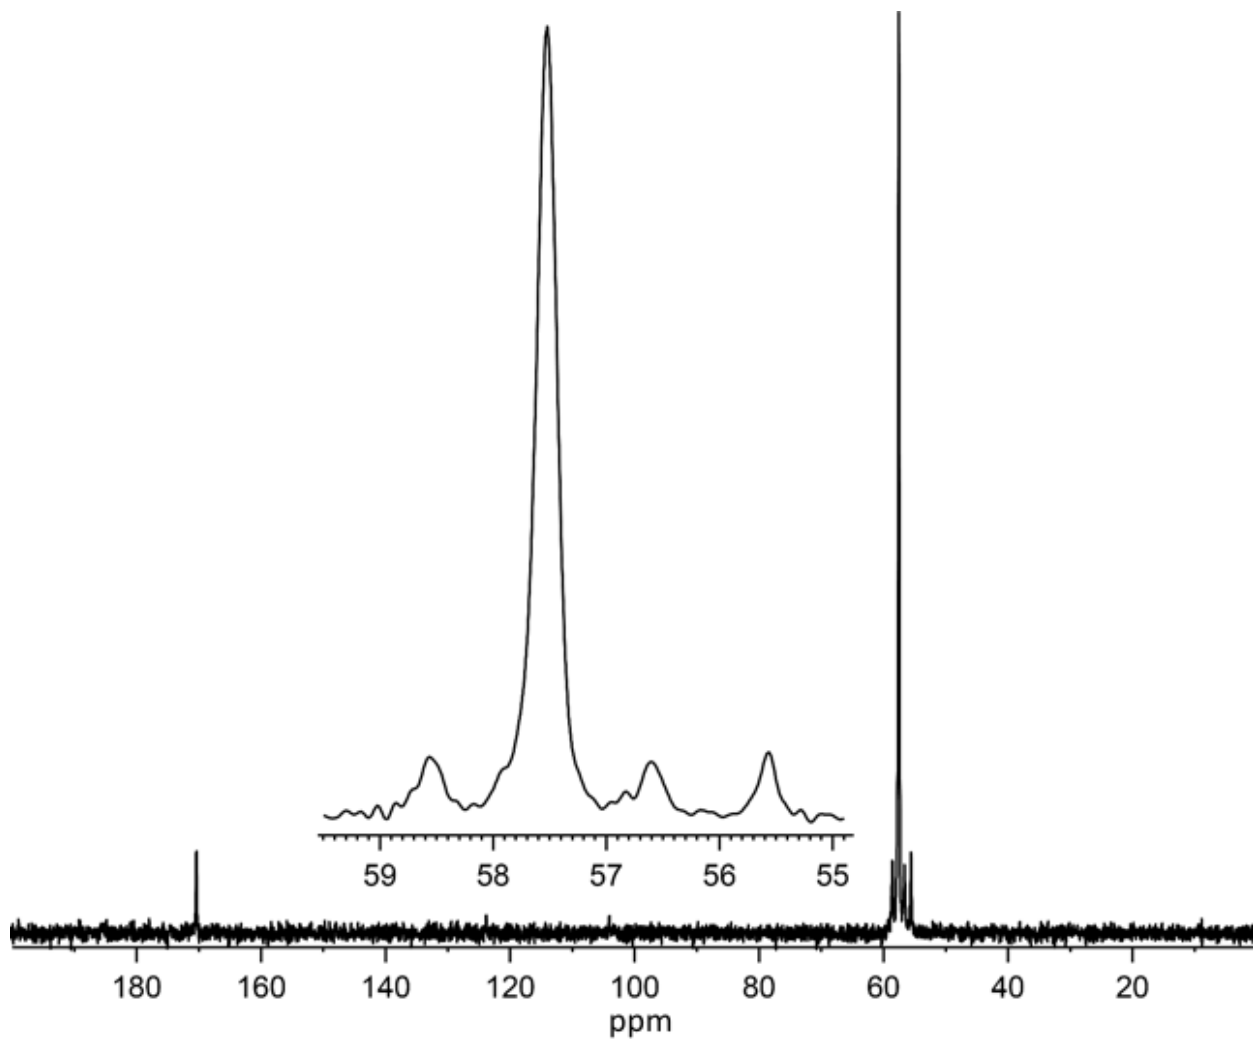

**Supplementary Figure 8.** Solid-state  $^{13}\text{C}$  (150.928 MHz) NMR spectrum of  $\text{Zr}[(\text{O}_3\text{PCH}_2)(\text{HO}_3\text{PCH}_2)\text{NHCH}_2\text{COOH}]_2 \cdot 2\text{H}_2\text{O}$ .

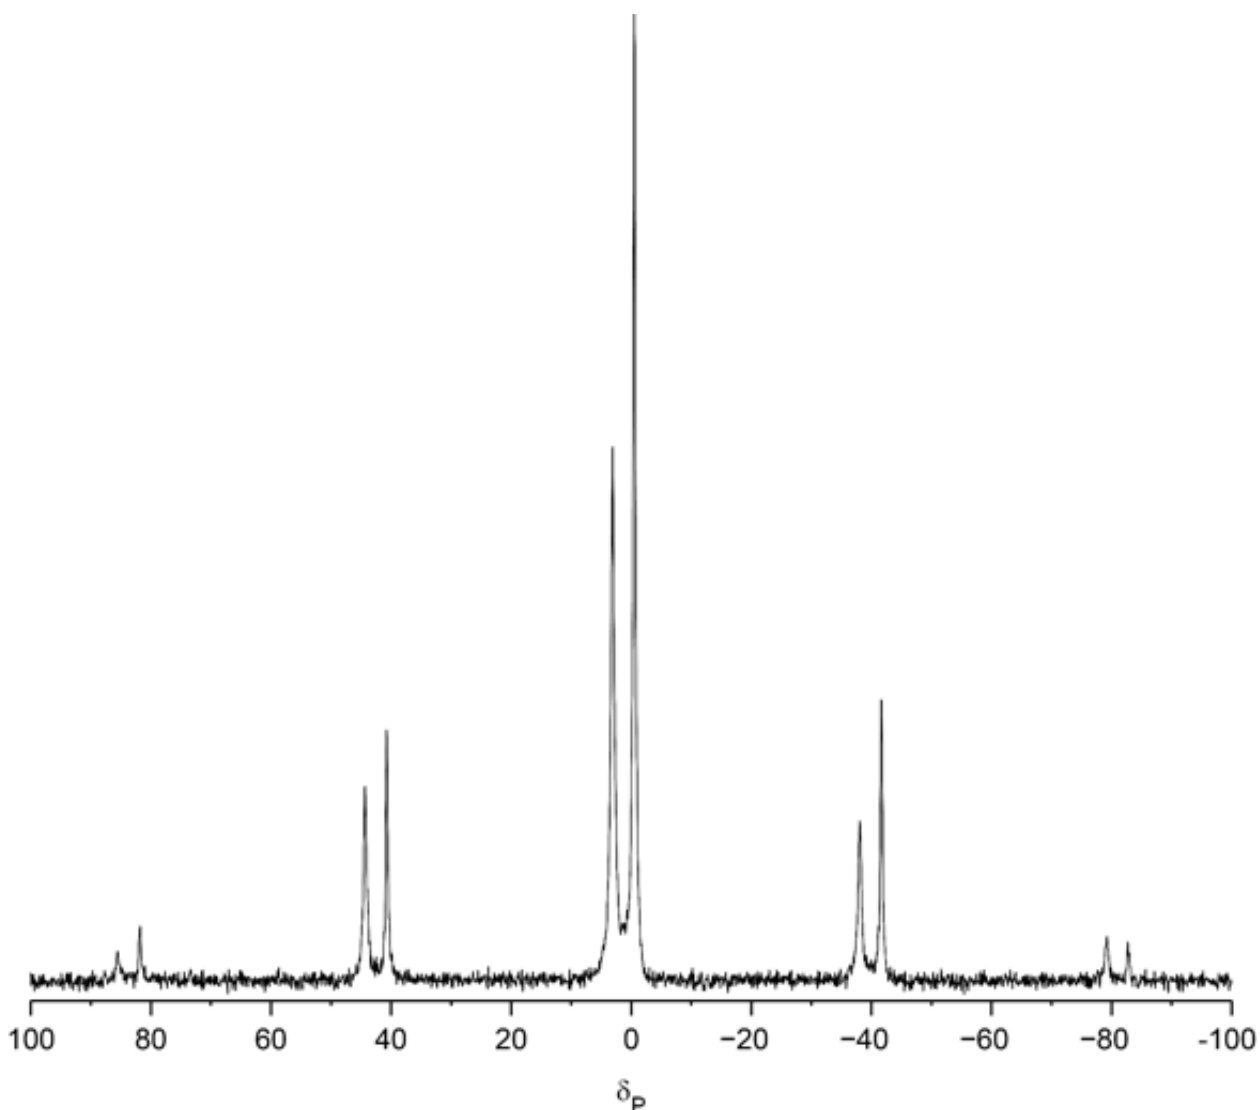

**Supplementary Figure 9.** Solid-state  $^{31}\text{P}$  (242.937 MHz) NMR spectrum of  $\text{Zr}[(\text{O}_3\text{PCH}_2)(\text{HO}_3\text{PCH}_2)\text{NHCH}_2\text{COOH}]_2 \cdot 2\text{H}_2\text{O}$ . All phosphorus nuclei exist in the same environment.

### Solid-State NMR

Pep-KG was synthesized via Solid Phase Peptide Synthesis (SPPS) with isotopically enriched [ $^{13}\text{C}$ ]Leucine and [ $^{15}\text{N}$ ]Alanine (Cambridge Isotopes) and assembled with nucleic acid templates at room temperature. A Bruker Avance 600MHz solid-state NMR spectrometer with a Bruker 4mm HCN BioSolids magic-angle spinning (MAS) probe was used to collect NMR spectra.  $^{13}\text{C}$  CP-MAS spectra before and after REDOR and  $^{13}\text{C}$  DQF-DRAWS experiments, confirmed the sample did not degrade during the experiment. Samples were centered in 4mm MAS ceramic rotors with



boron nitride spacers. All spectra were collected with spin-temperature alternation of the initial  $^1\text{H}$  (600.133 MHz)  $1.9\mu\text{s}$   $\pi/2$  pulse.  $^1\text{H}$  cross-polarization RF fields were ramped from 50 to 70 kHz and the  $^{13}\text{C}$  (150.929 MHz) cross-polarization RF field was kept constant at 50kHz. SPINAL-64  $^1\text{H}$  decoupling at 128 kHz was used during both dipolar evolution and acquisition.

During the REDOR experiments, MAS frequency was actively maintained at 10kHz +/- 2 Hz with exit cooling and spinning air temperature below  $-1^\circ\text{C}$ , to prevent sample denaturation. The  $^{13}\text{C}\{^{15}\text{N}\}$ REDOR<sup>[3]</sup> pulse sequence<sup>[4]</sup> consists of two parts, an S sequence that contains both  $^{13}\text{C}$  (150.928 MHz) and  $^{15}\text{N}$  (60.818 MHz) rotor synchronized xy8 phase cycled<sup>[5]</sup>  $\pi$ -pulses of  $4\mu\text{s}$  and  $8\mu\text{s}$  respectively, and a full-echo ( $S_0$ ) sequence which is identical but does not contain any  $^{15}\text{N}$  dephasing pulses. In addition to xy8 phase cycling of the REDOR  $\pi$ -pulses, the last refocusing  $\pi$ -pulse followed exorcycle phase cycling<sup>[6]</sup> to minimizing the effects of RF inhomogeneity. The  $^{13}\text{C}\{^{31}\text{P}\}$ REDOR pulse sequences were identical with  $10\mu\text{s}$   $^{31}\text{P}$   $\pi$ -pulses. REDOR data points are the integrated sum of center- and sideband peaks. Error bars are calculated using the noise of each spectrum as the maximum peak height deviation. To normalize for the decay due to  $T_2$  (spin-spin relaxation), individual REDOR curves are plotted as  $\Delta S/S_0$ . The REDOR dephasing curves is directly related to the  $^{13}\text{C}$ - $^{15}\text{N}$  or  $^{13}\text{C}$ - $^{31}\text{P}$  dipolar coupling, in the  $^{13}\text{C}\{^{15}\text{N}\}$ REDOR and  $^{13}\text{C}\{^{31}\text{P}\}$ REDOR experiments, respectively, hence the distance between the spins. As more than one  $^{15}\text{N}$  and  $^{31}\text{P}$  is present, the resulting REDOR curves depends on both the  $^{13}\text{C}$ - $^{15}\text{N}/^{31}\text{P}$  distances as well as the relative orientations of the  $^{13}\text{C}$ - $^{15}\text{N}/^{31}\text{P}$  internuclear vectors<sup>[7], [8]</sup>. The effects of finite pulses on REDOR dephasing was calibrated with  $[1\text{-}^{13}\text{C}, ^{15}\text{N}]$ Alanine diluted 10:1<sup>[9]</sup> for  $^{13}\text{C}\{^{15}\text{N}\}$ REDOR and with  $\text{Zr}[(\text{O}_3\text{PCH}_2)(\text{HO}_3\text{PCH}_2)\text{NHCH}_2\text{COOH}]_2 \cdot 2\text{H}_2\text{O}$  as described below for  $^{13}\text{C}\{^{31}\text{P}\}$ REDOR..

$^{13}\text{C}$  DQF-DRAWS experiments were implemented with phase cycling previously described<sup>[10]</sup> and 41.23 kHz  $^{13}\text{C}$  RF field for DRAWS pulses, measured by fitting a  $^{13}\text{C}$  nutation curve to a sine function with a decaying exponential. The rotor period ( $206.2\mu\text{s} \rightarrow \nu_r = 4.85$  kHz) was set to 8.5 times the  $^{13}\text{C}$   $\pi$  pulse length.  $T_2\text{DQ} = 11.2$  ms was measured in separate experiments by placing a composite 90x-90y-90x DQ coherence refocusing pulse<sup>[11]</sup> between the two DRAWS evolution periods which were fixed at 40-Tr. Data points are the ratio of the sum of center- and sideband-integrated peak intensities for each evolution time to the  $^{13}\text{C}$  CP-MAS intensities. Error bars are calculated using the noise of each spectrum as the maximum peak height deviation. DQF-DRAWS curves were calculated using SIMPSON<sup>[12]</sup>, where an array of  $^{13}\text{C}$  spins were approximated with an "infinite-loop" model<sup>[11]</sup> and chemical shift tensor components  $\delta_{11}=74.1\text{ppm}$ ,  $\delta_{22}=6.0\text{ppm}$  and  $\delta_{33}=-80.1\text{ppm}$ , which were measured from the  $^{13}\text{C}$  CP-MAS

spectra. The infinite loop model consists of three spins with identical dipolar couplings but with the orientation of the CSA to dipolar tensors identical between spins 1-2 and spins 3-1. The effects of DQ-relaxation were approximated by multiplying the calculated SQ intensity with a decaying exponential of the form  $e^{-\frac{t}{2 \cdot T_2DQ}}$  with  $T_2DQ = 11.2$  ms. DRAWS curves were calculated from 3Å to 7Å and used to find a best fit to the experimental data points by minimizing the residual:  $\chi = \sqrt{\frac{\sum_{i=1}^n w_i(x_i - x_{calc})^2}{n}}$ , where  $x_i$  and  $w_i$  are the experimental data and error, respectively.

### **$^{13}C\{^{31}P\}$ REDOR of $Zr[(O_3PCH_2)(HO_3PCH_2)NHCH_2COOH]_2 \cdot 2H_2O$**

$^{13}C\{^{31}P\}$ REDOR was carried out as described in the main text. All  $^{31}P$  nuclei within 10Å of [ $2-^{13}C$ ] Glyphosine of  $Zr[(O_3PCH_2)(HO_3PCH_2)NHCH_2COOH]_2$  contributed to  $^{13}C$ - $^{31}P$  dephasing and were included in the calculations. Knowledge of all the  $^{13}C$  and  $^{31}P$  nuclei positions from the crystal structure of this sample allowed for its use as a standard for  $^{13}C - ^{31}P$  distance measurements.

### **References**

- [1] J. Schindelin *et al.*, *Nat. Methods* **2012**, 9, 676–682.
- [2] M. Taddei, A. Donnadio, F. Costantino, R. Vivani, and M. Casciola, *Inorg. Chem* **2013**, 52, 12131–12139.
- [3] T. Gullion in *Modern Magnetic Resonance*, (Dordrecht) Springer, Netherlands, **2008**, pp. 713–718.
- [4] A. M. Christensen and J. Schaefer, *Biochemistry* **1993**, 32, 2868–2873.
- [5] T. Gullion, D. B. Baker, and M. S. Conradi, *J. Magn. Reson.* **1990**, 89, 479–484.
- [6] M. Rance and R. A. Byrd, *J. Magn. Reson.* **1983**, 52, 221-240.
- [7] T. P. Jarvie, G. T. Went, and K. T. Mueller, *J. Am. Chem. Soc.* **1996**, 118, 5330-5331.
- [8] J. M. Goetz and J. Schaefer, *J. Magn. Reson.* **1997**, 127, 147–154.
- [9] A. K. Mehta *et al.*, *J. Am. Chem. Soc.* **2008**, 130, 9829–9835.
- [10] M. A. Mehta, M. T. Eddy, S. A. McNeill, F. D. Mills, and J. R. Long, *J. Am. Chem. Soc.* **2008**, 130, 2202-2212.

[11] D. M. Gregory *et al.*, *Solid State Nucl. Magn. Reson.* **1998**, *13*, 149-166.

[12] M. Bak, J. T. Rasmussen, and N. C. Nielsen, *J. Magn. Reson.* **2000**, *147*, 296–330.
